# Supplementary material for: TRIP13 localizes to synapsed chromosomes and functions as a dosage-sensitive regulator of meiosis
Source: eLife journal article supplement (doi:10.7554/elife.92195), 2023-11-22

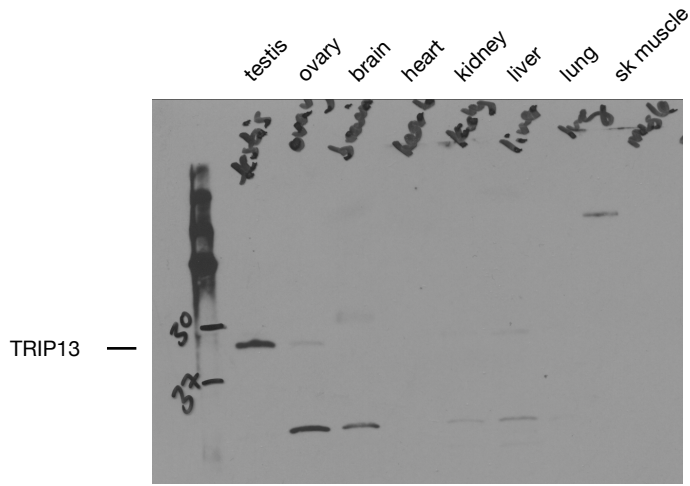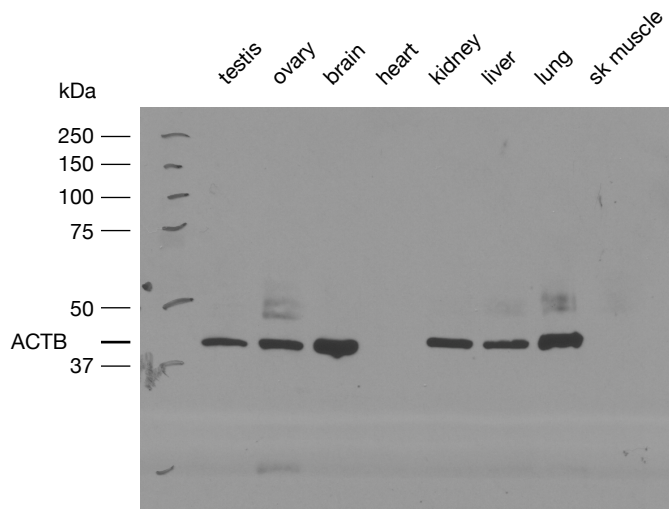

Supplement: fig1-data1 [file elife-92195-fig1-data1-v1.pdf]
