# Supplementary material for: TRIP13 localizes to synapsed chromosomes and functions as a dosage-sensitive regulator of meiosis
Source: eLife journal article supplement (doi:10.7554/elife.92195), 2023-11-22

P20 testis

P20 testis

+/+  
+/3xFLAG-Trip13  
FLAG/FLAG

+/+  
+/Trip13-3xFLAG  
FLAG/FLAG

WB  
anti-FLAG

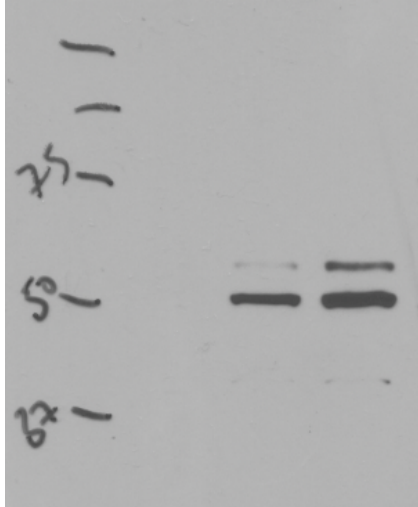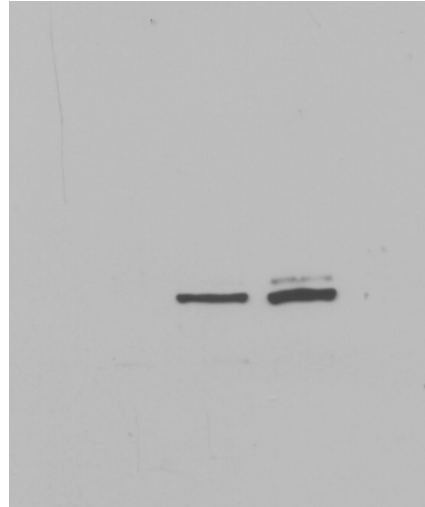

WB  
anti-TRIP13

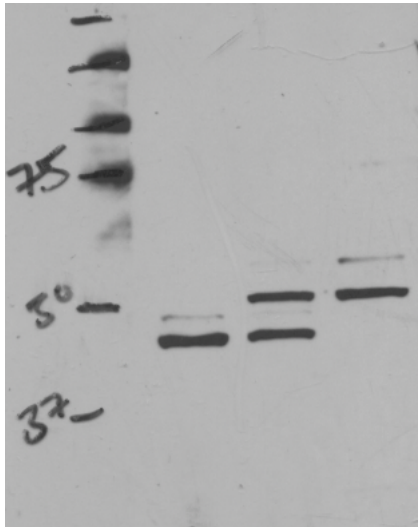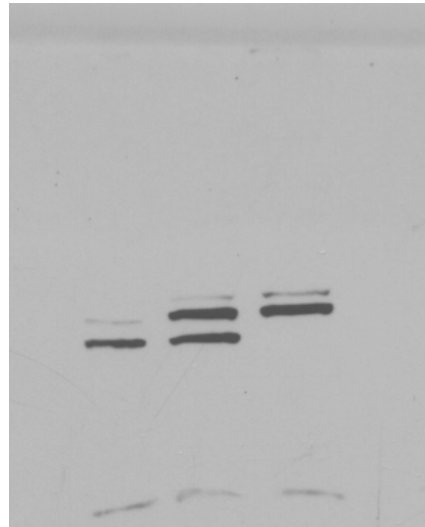

Supplement: fig7-data1 [file elife-92195-fig7-data1-v2.pdf]
